# Supplementary material for: Cardiovascular and mortality events in type 2 diabetes cardiovascular outcomes trials: a systematic review with trend analysis
Source: PubMed Central journal article supplement (PMC6394717; doi:10.1007/s00592-018-1253-5), 2018-11-19
Supplement: 592_2018_1253_MOESM1_ESM.pdf [file 592_2018_1253_MOESM1_ESM.pdf]

# Supplemental Material

## Cardiovascular and mortality events in type 2 diabetes cardiovascular outcomes trials: A systematic review with trend analysis

Lorenzo M Vetrone<sup>a b \*</sup>, Francesco Zaccardi<sup>a \*</sup>, David R Webb<sup>a</sup>, Sam Seidu<sup>a</sup>, Nitin N Gholap<sup>c</sup>, Dario Pitocco<sup>b</sup>, Melanie J Davies<sup>a</sup>, Kamlesh Khunti<sup>a</sup>

\* Equally contributed

<sup>a</sup> Diabetes Research Centre, Leicester Diabetes Centre, Leicester General Hospital Gwendolen Rd, Leicester, LE5 4PW, England, UK

<sup>b</sup> Servizio di Diabetologia, Catholic University School of Medicine, Largo Francesco Vito 1, 00198 Roma

<sup>c</sup> University Hospital of Coventry and Warwickshire, Coventry, Clifford Bridge Rd, Coventry, CV2 2DX, England, UK

### Contents

|                                                                                                               |           |
|---------------------------------------------------------------------------------------------------------------|-----------|
| <b>Table S1:</b> Studies excluded, with reasons.....                                                          | 2         |
| <b>Table S2:</b> Total number of events and participants, by outcome.....                                     | 2         |
| <b>Table S3:</b> Major Adverse Cardiovascular Events (MACE) definitions .....                                 | 3         |
| <b>Table S4:</b> Risk of bias for the included studies .....                                                  | 4         |
| <b>Table S5:</b> Rate differences .....                                                                       | 5         |
| <b>Table S6:</b> Five-year rate ratios for studies with consistent MACE definitions.....                      | 5         |
| <b>Table S7:</b> Five-year rate ratios excluding studies conducted before year 2000.....                      | 5         |
| <b>Table S8:</b> Five-year rate ratios adjusted for baseline HbA1c.....                                       | 6         |
| <b>Table S9:</b> Standardised mortality rates in people with diabetes in selected observational studies ..... | 7         |
| <b>Figure S1:</b> PRISMA flow chart and search strategy.....                                                  | 8         |
| <b>Figure S2:</b> Study-level baseline characteristics and outcome rates .....                                | 9         |
| <b>References of the included randomised controlled trials.....</b>                                           | <b>10</b> |

**Table S1: Studies excluded, with reasons**

| Randomised Controlled Trial | PubMed ID | Reason for exclusion                                             |
|-----------------------------|-----------|------------------------------------------------------------------|
| SDIS                        | 3048052   | Type 1 diabetes                                                  |
| KUMAMOTO-6                  | 7587918   | Mean follow-up and rates unavailable                             |
| KUMAMOTO-8                  | 10860187  | Mean follow-up and rates unavailable                             |
| Wing et al                  | 14527106  | Non-randomized study                                             |
| DIGAMI 2                    | 15728645  | Inpatient treatment                                              |
| HOME                        | 19307526  | Mean follow-up and rates unavailable                             |
| Finnish DPS                 | 19479072  | Patients with Impaired Glucose Tolerance only                    |
| BARI 2D                     | 19502645  | No randomization to glucose-lowering/intensive glucose treatment |
| NAVIGATOR                   | 20228402  | Patients with Impaired Glucose Tolerance only                    |
| ACCORD follow-up            | 20427682  | Secondary epidemiological analysis                               |
| J-EDIT                      | 22435936  | Only composite data available                                    |
| PROFIT-J                    | 24477028  | Only composite data available                                    |
| Da Qing                     | 24731674  | Patients with Impaired Glucose Tolerance only                    |
| ACE                         | 28917545  | Patients with Impaired Glucose Tolerance only                    |
| PROactive follow-up         | 26592506  | Follow-up study                                                  |
| UKPDS follow-up             | 18784090  | Follow-up study                                                  |
| STENO-2 2008 follow-up      | 18256393  | Follow-up study                                                  |
| STENO-2 2016 follow-up      | 27531506  | Follow-up study                                                  |
| DCGP follow-up              | 23549519  | Follow-up study                                                  |
| UKPDS 34                    | 9742977   | Subgroup of the main UKPDS study                                 |

**Table S2: Total number of events and participants, by outcome**

| Outcome                                    | Number of                    |        |              |              |
|--------------------------------------------|------------------------------|--------|--------------|--------------|
|                                            | Randomised Controlled Trials | Events | Participants | Person-years |
| All-cause mortality                        | 26                           | 6543   | 86788        | 322074       |
| Cardiovascular disease mortality           | 19                           | 3265   | 71405        | 241661       |
| Total stroke                               | 16                           | 1948   | 53157        | 229621       |
| *Major Adverse Cardiovascular Events       | 15                           | 7657   | 71641        | 244273       |
| Total myocardial infarction                | 14                           | 3260   | 55359        | 221236       |
| Nonfatal myocardial infarction             | 12                           | 1944   | 37607        | 133017       |
| Nonfatal stroke                            | 11                           | 813    | 34732        | 111785       |
| Fatal myocardial infarction                | 5                            | 113    | 9705         | 46696        |
| Silent myocardial infarction               | 3                            | 97     | 8120         | 24788        |
| Fatal stroke                               | 3                            | 45     | 6925         | 39549        |
| Total myocardial infarction (no silent)    | 1                            | 126    | 2333         | 6528         |
| Nonfatal myocardial infarction (no silent) | 1                            | 121    | 2333         | 6541         |
| Total ischemic stroke                      | 1                            | 141    | 8212         | 16588        |

Outcomes are listed by number of randomised controlled trials.

\* MACE: definitions reported in Table S3.

**Table S3: Major Adverse Cardiovascular Events (MACE) definitions**

| <b>Randomised Controlled Trial</b> | <b>Major Adverse Cardiovascular Events (MACE) definition</b>                                                               |
|------------------------------------|----------------------------------------------------------------------------------------------------------------------------|
| ACCORD                             | Nonfatal myocardial infarction, nonfatal stroke, death from cardiovascular causes                                          |
| ADVANCE                            | Cardiovascular death, nonfatal myocardial infarction, nonfatal stroke                                                      |
| ALECARDIO                          | Cardiovascular mortality, nonfatal myocardial infarction, nonfatal stroke                                                  |
| CANVAS                             | Death from cardiovascular causes, nonfatal myocardial infarction, nonfatal stroke                                          |
| DEVOTE                             | Death from cardiovascular causes, nonfatal myocardial infarction, nonfatal stroke                                          |
| EMPAREG                            | Death from cardiovascular causes, nonfatal myocardial infarction (excluding silent myocardial infarction), nonfatal stroke |
| EXAMINE                            | Death from cardiovascular causes, nonfatal myocardial infarction, nonfatal stroke                                          |
| EXSCEL                             | Death from cardiovascular causes, nonfatal myocardial infarction, nonfatal stroke                                          |
| LEADER                             | First occurrence of death from cardiovascular causes, nonfatal (including silent) myocardial infarction, nonfatal stroke   |
| LOOK AHEAD                         | Death from cardiovascular causes, nonfatal myocardial infarction, nonfatal stroke                                          |
| ORIGIN                             | Death from cardiovascular causes, nonfatal myocardial infarction, nonfatal stroke                                          |
| RECORD                             | Cardiovascular death, myocardial infarction, stroke                                                                        |
| SAVOR-TIMI 53                      | Cardiovascular death, myocardial infarction, stroke                                                                        |
| SUSTAIN-6                          | Death from cardiovascular causes, nonfatal myocardial infarction (including silent), nonfatal stroke                       |
| TECOS                              | Cardiovascular death, nonfatal myocardial infarction, nonfatal stroke                                                      |

Trials are listed by acronym alphabetical order.

**Table S4:** Risk of bias for the included studies

| Randomised Controlled Trial | Random Sequence   | Allocation Concealment | Blinding of participants and researchers | Blinding of outcome assessment | Incomplete outcome data | Selective reporting data | Other                |
|-----------------------------|-------------------|------------------------|------------------------------------------|--------------------------------|-------------------------|--------------------------|----------------------|
| ACCORD                      | Low               | Unclear                | High                                     | Low                            | Low                     | Low                      | Low                  |
| ADDITION                    | Low               | Low                    | High                                     | Low                            | Low                     | Low                      | Low                  |
| ADVANCE                     | Low               | Low                    | Low                                      | Low                            | Low                     | Low                      | Low                  |
| ALECARDIO                   | Low               | Low                    | Low                                      | Low                            | Low                     | Low                      | Low                  |
| CANVAS                      | Low               | Low                    | Low                                      | Low                            | High                    | Low                      | Low                  |
| DCGP                        | Low               | Low                    | High                                     | High                           | Low                     | Low                      | Unclear              |
| DEVOTE                      | Low               | Low                    | Low                                      | Low                            | Low                     | Low                      | Low                  |
| ELIXA                       | Low               | Low                    | Low                                      | Low                            | Low                     | Low                      | Low                  |
| EMPAREG                     | Low               | Low                    | Low                                      | Low                            | Low                     | Low                      | Low                  |
| EXAMINE                     | Low               | Low                    | Low                                      | Low                            | Low                     | Low                      | Low                  |
| EXSCEL                      | Low               | Low                    | Low                                      | Low                            | Low                     | Low                      | Low                  |
| HEART2D                     | Low               | Low                    | High                                     | High                           | Low                     | Low                      | Low                  |
| JDCS                        | Low               | Low                    | High                                     | High                           | Unclear                 | Low                      | Unclear              |
| LEADER                      | Low               | Low                    | Low                                      | Low                            | Low                     | Low                      | Low                  |
| LOOK AHEAD                  | Low               | Low                    | High                                     | Low                            | Low                     | Low                      | Low                  |
| ORIGIN                      | Low               | Low                    | High                                     | Low                            | Low                     | Low                      | Unclear              |
| PROactive                   | Low               | Low                    | Low                                      | Low                            | Low                     | Low                      | Low                  |
| RECORD                      | Low               | Low                    | Low                                      | Low                            | Low                     | Low                      | Low                  |
| SAVOR-TIMI 53               | Low               | Low                    | Low                                      | Low                            | Low                     | Low                      | Low                  |
| STENO-2                     | Low               | Low                    | High                                     | Low                            | Low                     | Low                      | Low                  |
| SUSTAIN-6                   | Low               | Low                    | Low                                      | Low                            | Low                     | Low                      | Unclear              |
| TECOS                       | Low               | Low                    | Low                                      | Low                            | Low                     | Low                      | Low                  |
| TOSCA                       | Low               | Low                    | High                                     | High                           | Low                     | Low                      | Low                  |
| UGDP                        | Low               | Low                    | Unclear                                  | Unclear                        | Low                     | Low                      | Unclear              |
| UKPDS 33                    | Low               | Low                    | Low                                      | Low                            | Low                     | Low                      | Unclear              |
| VADT                        | Low               | Low                    | Low                                      | Low                            | Low                     | Low                      | Unclear              |
| <b>OVERALL</b>              | <b>100% Low</b>   | <b>96.2% Low</b>       | <b>61.5% Low</b>                         | <b>80.8% Low</b>               | <b>92.3% Low</b>        | <b>100% Low</b>          | <b>73.1% Low</b>     |
|                             | <b>0% Unclear</b> | <b>3.8% Unclear</b>    | <b>3.9% Unclear</b>                      | <b>3.8% Unclear</b>            | <b>3.9% Unclear</b>     | <b>0% Unclear</b>        | <b>26.9% Unclear</b> |
|                             | <b>0% High</b>    | <b>0% High</b>         | <b>34.6% High</b>                        | <b>15.4% High</b>              | <b>3.8% High</b>        | <b>0% High</b>           | <b>0% High</b>       |

Trials are listed by acronym alphabetical order.

**Table S5: Rate differences**

| Outcome                              | Comparison (years) | Rate difference per 1000 person-years (95% CI) |
|--------------------------------------|--------------------|------------------------------------------------|
| All-cause mortality                  | 2015 vs 2000       | 1.9 (-3.8, 7.7)                                |
| Cardiovascular disease mortality     | 2015 vs 2000       | 5.5 (0.2, 10.8)                                |
| Major Adverse Cardiovascular Events* | 2015 vs 2000       | 44.7 (27.3, 62.0)                              |
| Total myocardial infarction          | 2010 vs 2000       | 0.7 (-5.4, 6.9)                                |
| Nonfatal myocardial infarction       | 2010 vs 2000       | 1.5 (-5.9, 8.9)                                |
| Total stroke                         | 2010 vs 2000       | 0.2 (-1.9, 2.3)                                |
| Nonfatal stroke                      | 2010 vs 2000       | -1.3 (-5.7, 3.2)                               |

Estimates reported for unadjusted models in the main analysis.

\* 3-point Major Adverse Cardiovascular Events: cardiovascular death, nonfatal myocardial infarction, nonfatal stroke. Detailed are reported in Table S3.

For myocardial infarction and stroke, the comparison was 2010 vs 2000 in view of studies availability over time (Figure 1). Other comparison years have been selected to facilitate the comparison with calendar time reported in observational studies available in the literature (Table S9).

**Table S6: Five-year rate ratios for studies with consistent MACE definitions**

| Outcome                          | Analysis    | No. of RCTs | 5-year Rate Ratio | P-value |
|----------------------------------|-------------|-------------|-------------------|---------|
| Cardiovascular disease mortality | Main        | 14          | 1.76 (1.13, 2.73) | 0.012   |
|                                  | Sensitivity | 13          | 1.65 (1.04, 2.62) | 0.035   |
| Nonfatal myocardial infarction   | Main        | 7           | 1.92 (1.52, 2.43) | <0.001  |
|                                  | Sensitivity | 6           | 0.35 (0.10, 1.15) | 0.083   |
| Nonfatal stroke                  | Main        | 7           | 2.26 (1.48, 3.46) | <0.001  |
|                                  | Sensitivity | 6           | 1.42 (0.65, 3.08) | 0.376   |

Estimates adjusted for age, sex, previous myocardial infarction and diabetes duration. Sensitivity analyses excluded HEART 2D, TOSCA and DEVOTE trial.

**Table S7: Five-year rate ratios excluding studies conducted before year 2000**

| Outcome                             | Analysis    | No. of RCTs | 5-year Rate Ratio | P-value |
|-------------------------------------|-------------|-------------|-------------------|---------|
| All-cause mortality                 | Main        | 21          | 0.98 (0.82, 1.17) | 0.861   |
|                                     | Sensitivity | 18          | 1.02 (0.85, 1.23) | 0.840   |
| Cardiovascular disease mortality    | Main        | 17          | 1.28 (0.96, 1.71) | 0.087   |
|                                     | Sensitivity | 15          | 1.64 (1.05, 2.56) | 0.028   |
| Major Adverse Cardiovascular Events | Main        | 15          | 1.27 (1.00, 1.61) | 0.046   |
|                                     | Sensitivity | 14          | 1.28 (1.03, 1.59) | 0.023   |
| Total myocardial infarction         | Main        | 12          | 0.90 (0.68, 1.19) | 0.473   |
|                                     | Sensitivity | 11          | 0.92 (0.52, 1.60) | 0.760   |
| Nonfatal myocardial infarction      | Main        | 10          | 0.72 (0.53, 0.98) | 0.038   |
|                                     | Sensitivity | 7           | 1.46 (1.11, 1.92) | 0.006   |
| Total stroke                        | Main        | 13          | 0.86 (0.72, 1.04) | 0.131   |
|                                     | Sensitivity | 12          | 0.82 (0.64, 1.05) | 0.120   |
| Nonfatal stroke                     | Main        | 9           | 0.97 (0.71, 1.31) | 0.840   |
|                                     | Sensitivity | 6           | 1.42 (0.65, 3.08) | 0.376   |

Estimates adjusted for age, sex, previous myocardial infarction and diabetes duration. Excluded studies (DGCP; JDCS; STENO-2; UGDP; UKPDS 33) had mid-point calendar year between start and end of recruitment <2000. Sensitivity analyses excluded HEART 2D, TOSCA and DEVOTE trial.

**Table S8:** Five-year rate ratios adjusted for baseline HbA1c

| Outcome                             | Analysis    | No. of RCTs | 5-year Rate Ratio | P-value |
|-------------------------------------|-------------|-------------|-------------------|---------|
| All-cause mortality                 | Main        | 25          | 1.01 (0.84, 1.20) | 0.949   |
|                                     | Sensitivity | 22          | 0.94 (0.80, 1.11) | 0.475   |
| Cardiovascular disease mortality    | Main        | 18          | 1.12 (0.82, 1.52) | 0.479   |
|                                     | Sensitivity | 16          | 1.37 (0.81, 2.31) | 0.242   |
| Major Adverse Cardiovascular Events | Main        | 15          | 1.27 (1.01, 1.60) | 0.040   |
|                                     | Sensitivity | 14          | 1.29 (1.08, 1.53) | 0.005   |
| Total myocardial infarction         | Main        | 14          | 0.85 (0.63, 1.15) | 0.287   |
|                                     | Sensitivity | 13          | 0.68 (0.46, 1.00) | 0.049   |
| Nonfatal myocardial infarction      | Main        | 12          | 0.89 (0.69, 1.15) | 0.370   |
|                                     | Sensitivity | 9           | 0.94 (0.68, 1.30) | 0.695   |
| Total stroke                        | Main        | 16          | 0.80 (0.69, 0.92) | 0.002   |
|                                     | Sensitivity | 15          | 0.75 (0.65, 0.88) | <0.001  |
| Nonfatal stroke                     | Main        | 11          | 0.90 (0.65, 1.24) | 0.513   |
|                                     | Sensitivity | 8           | 4.33 (2.60, 7.21) | <0.001  |

Estimates adjusted for age, sex, previous myocardial infarction, diabetes duration, and baseline HbA1c. Sensitivity analyses excluded HEART 2D, TOSCA and DEVOTE trial.

**Table S9:** Standardised mortality rates in people with diabetes in selected observational studies

| Country   | Study                                             | Age at baseline<br>(mean/median) | Year  |      | Rate<br>(per 1000 PYs) |      | Note                   | Reference<br>(PubMed ID) |
|-----------|---------------------------------------------------|----------------------------------|-------|------|------------------------|------|------------------------|--------------------------|
|           |                                                   |                                  | Start | End  | Start                  | End  |                        |                          |
| SWEDEN    | Swedish National Diabetes Register (NDR)          | 65.2                             | 1998  | 2013 | 40.6                   | 34.4 | T2DM                   | 28402770                 |
| SCOTLAND  | Scottish Care Information-Diabetes (SCI-Diabetes) | 60.0                             | 2004  | 2013 | 19.8                   | 18.1 | T2DM                   | 27465219                 |
| US        | National Health Interview Survey Linked Mortality | 60.0                             | 1988  | 2015 | 23.1                   | 15.2 | T1 & T2DM              | 29784146                 |
| US        | National Center for Health Statistics survey      | 60.0                             | 1997  | 2006 | 20.3                   | 15.1 | T1 & T2DM              | 22619288                 |
| SWEDEN    | Three national Swedish registries                 | 62.7                             | 2006  | 2013 | 15.5                   | 14.3 | T2DM on any medication | 27189067                 |
| UK        | The Health Improvement Network (THIN) database    | 62.9                             | 1996  | 2009 | 31.4                   | 14.1 | T1 & T2DM              | 24114114                 |
| CANADA    | Ontario diabetes database                         | 60.2                             | 1995  | 2005 | 17.6                   | 13.3 | T1 & T2DM              | 17336651                 |
| CANADA    | Population-based healthcare databases (Ontario)   | 61.0                             | 1996  | 2009 | 19.4                   | 12.2 | T1 & T2DM              | 24114114                 |
| AUSTRALIA | National Diabetes Service Scheme (NDSS) registry  | 58.5                             | 2000  | 2011 | 9.7                    | 7.9  | T2DM                   | 27208325                 |
| AUSTRALIA | National Diabetes Service Scheme (NDSS) registry  | 60.0                             | 1997  | 2010 | 9.4                    | 5.5  | T2DM                   | 24947787                 |

Studies are listed by mortality rate at the end of observation time

T1DM: Type 1 diabetes mellitus; T2DM: Type 2 diabetes mellitus;

Selected observational studies reporting standardised mortality rates in people with diabetes in the last two decades.

PubMed Keywords search: diabetes[title] AND (trends[title] OR rates[title] OR trend[title] OR rate[title]) AND (mortality[title] OR death[title]) on 30/05/2018.

| PubMed ID | Reference                                                                                                                                                                                                                                              |
|-----------|--------------------------------------------------------------------------------------------------------------------------------------------------------------------------------------------------------------------------------------------------------|
| 28402770  | Rawshani A et al. <i>Mortality and Cardiovascular Disease in Type 1 and Type 2 Diabetes</i> . N Engl J Med. 2017; 376:1407-1418                                                                                                                        |
| 27465219  | Read SH et al. <i>Trends in type 2 diabetes incidence and mortality in Scotland between 2004 and 2013</i> . Diabetologia. 2016; 59:2106-13                                                                                                             |
| 29784146  | Gregg EW et al. <i>Trends in cause-specific mortality among adults with and without diagnosed diabetes in the USA: an epidemiological analysis of linked national survey and vital statistics data</i> . Lancet. 2018; 391:2430-2440                   |
| 22619288  | Gregg EW et al. <i>Trends in death rates among U.S. adults with and without diabetes between 1997 and 2006: findings from the National Health Interview Survey</i> . Diabetes Care. 2012; 35:1252-7                                                    |
| 27189067  | Norhammar A et al. <i>Incidence, prevalence and mortality of type 2 diabetes requiring glucose-lowering treatment, and associated risks of cardiovascular complications: a nationwide study in Sweden, 2006-2013</i> . Diabetologia. 2016; 59:1692-701 |
| 24114114  | Lind M et al. <i>Mortality trends in patients with and without diabetes in Ontario, Canada and the UK from 1996 to 2009: a population-based study</i> . Diabetologia. 2013; 56:2601-8                                                                  |
| 17336651  | Lipscombe LL et al. <i>Trends in diabetes prevalence, incidence, and mortality in Ontario, Canada 1995-2005: a population-based study</i> . Lancet. 2007; 369:750-6                                                                                    |
| 27208325  | Harding JL et al. <i>Age-Specific Trends From 2000-2011 in All-Cause and Cause-Specific Mortality in Type 1 and Type 2 Diabetes: A Cohort Study of More Than One Million People</i> . Diabetes Care. 2016; 39:1018-26                                  |
| 24947787  | Harding JL et al. <i>Mortality trends among people with type 1 and type 2 diabetes in Australia: 1997-2010</i> . Diabetes Care. 2014; 37:2579-86                                                                                                       |

Figure S1: PRISMA flow chart and search strategy

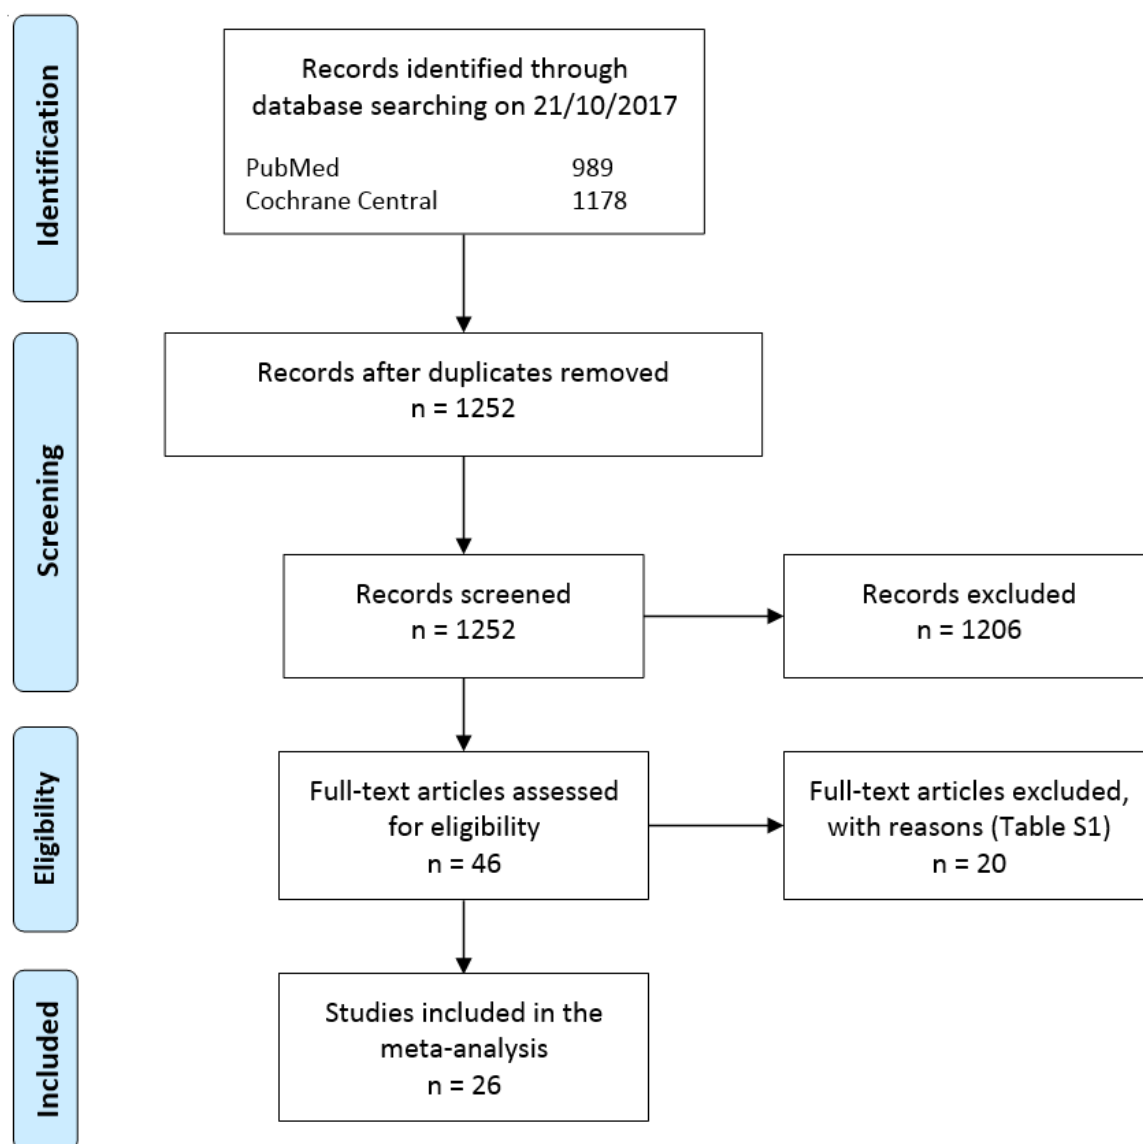

### Search Strategy

Articles published in English from inception to 21/10/2017 were searched in PubMed and Cochrane Central databases. Electronic search was supplemented by scanning reference lists of all relevant articles, including reviews, by hand searching of relevant journals.

For PubMed, the search was:

((Diabetes[Title]) AND (Fatal[Title/Abstract] OR Stroke[Title/Abstract] OR Infar\*[Title/Abstract] OR Death[Title/Abstract] OR Mortality[Title/Abstract])) NOT Type 1[Title] Filters: Clinical Trial; Humans

For Cochrane Central, the search was:

#1 "diabetes":ti in Trials; #2 "fatal":ti,ab,kw or "stroke":ti,ab,kw or "infarct":ti,ab,kw or "infarction":ti,ab,kw or "death":ti,ab,kw; #3 "mortality":ti,ab,kw; #4 "type 1 diabetes mellitus":ti,ab,kw or "type 1 diabetes" or "type 1 DM" or "type 1 diabetic"

#5 #1 and (#2 or #3) not #4



Figure S2: Study-level baseline characteristics and outcome rates

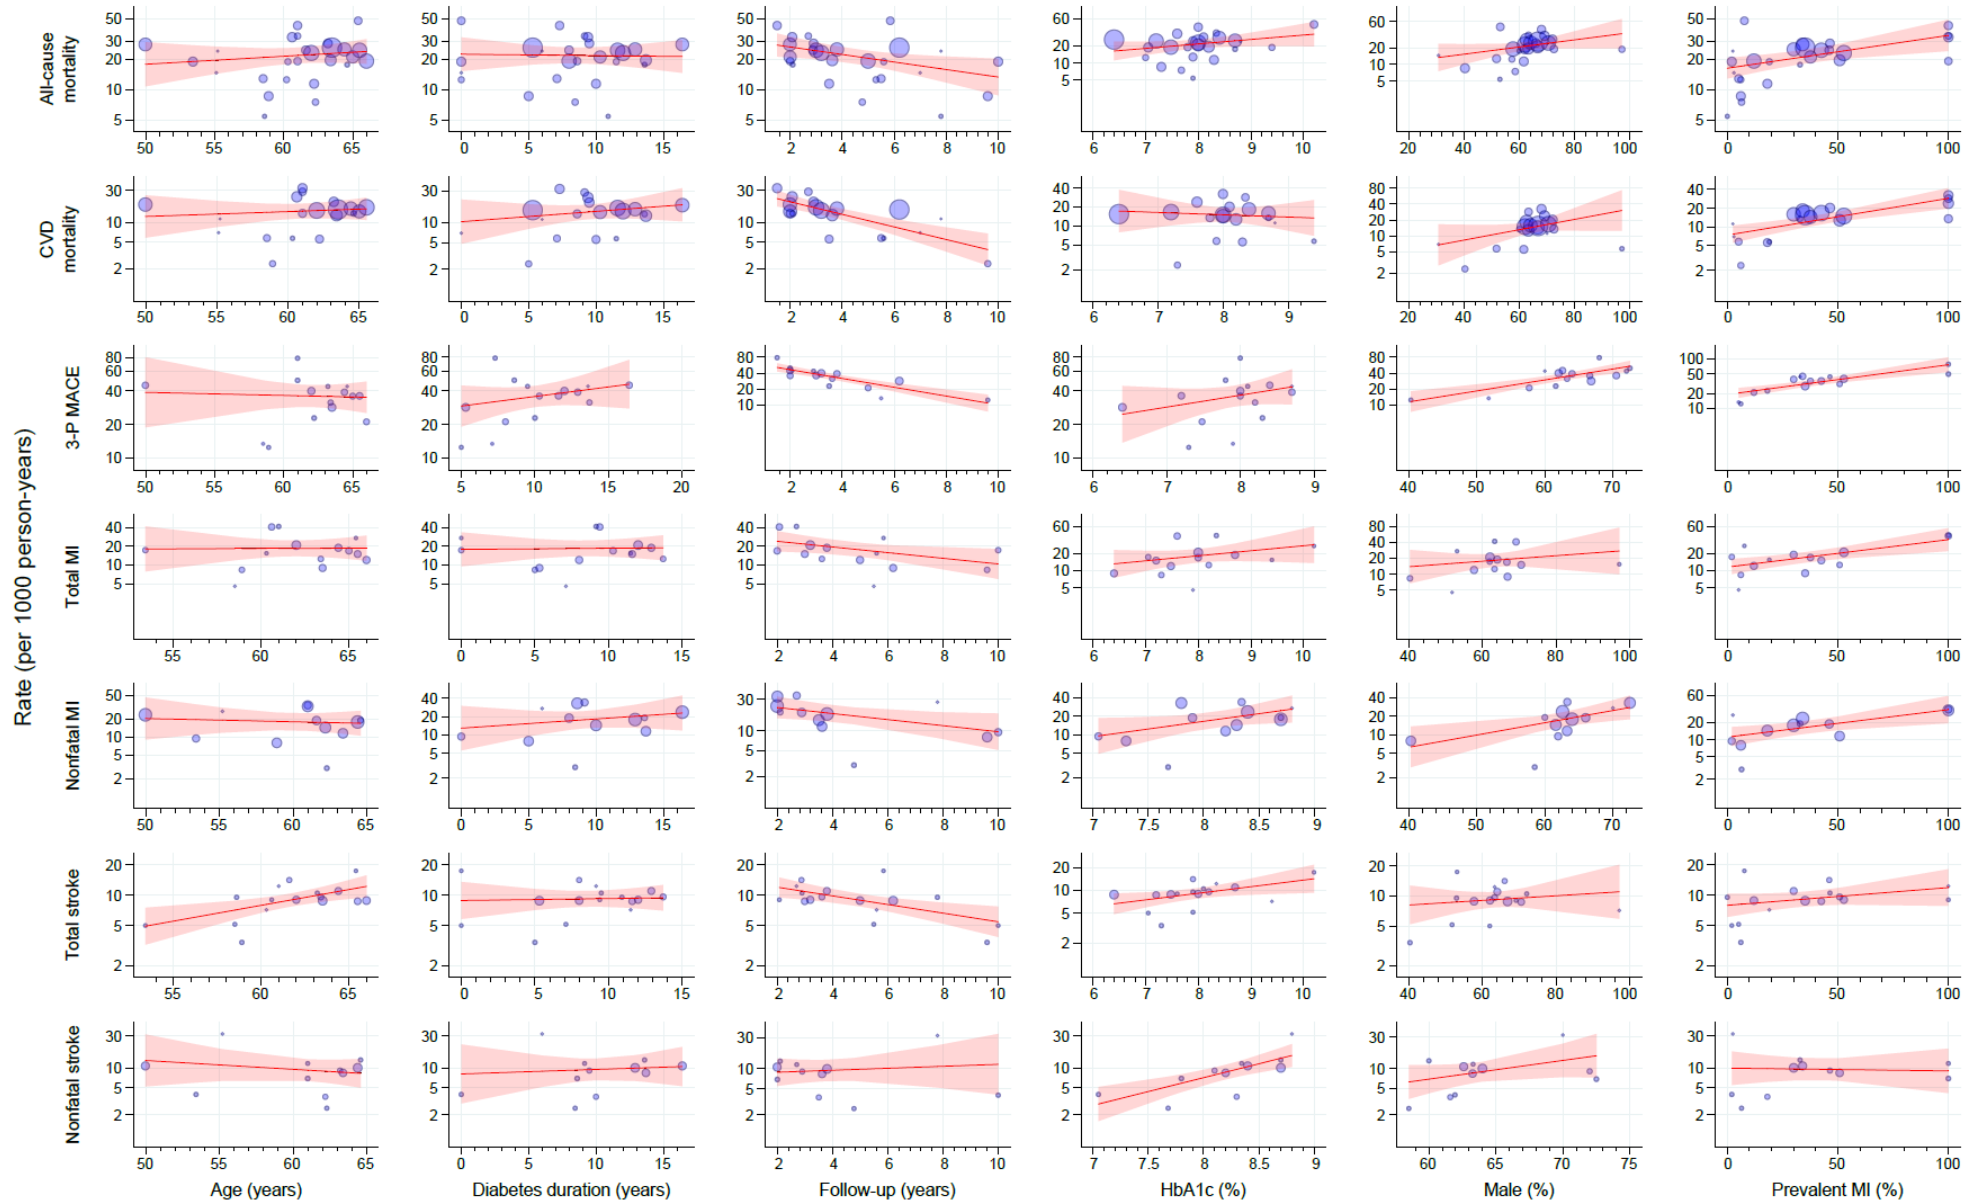

Each circle indicates a randomised controlled trial and its size is proportional to the inverse of rate variance. Shadow areas indicate 95% confidence interval.

## References of the included randomised controlled trials

| RCT acronym | PubMed ID | Reference |
|-------------|-----------|-----------|
| ACCORD      | 18539917  | 1         |
| ADDITION    | 21705063  | 2         |
| ADVANCE     | 18539916  | 3         |
| ALECARDIO   | 24682069  | 4         |
| CANVAS      | 28605608  | 5         |
| DCGP        | 23549519  | 6         |
| DEVOTE      | 28605603  | 7         |
| ELIXA       | 26630143  | 8         |
| EMPAREG     | 26378978  | 9         |
| EXAMINE     | 23992602  | 10        |
| EXSCEL      | 28910237  | 11        |
| HEART2D     | 19246588  | 12        |
| JDCS        | 20054522  | 13        |
| LEADER      | 27295427  | 14        |
| LOOK AHEAD  | 23796131  | 15        |
| ORIGIN      | 22686416  | 16        |
| PROactive   | 16214598  | 17        |
| RECORD      | 19501900  | 18        |
| SAVOR-TIMI  | 23992601  | 19        |
| STENO-2     | 12556541  | 20        |
| SUSTAIN-6   | 27633186  | 21        |
| TECOS       | 26052984  | 22        |
| TOSCA       | 28917544  | 23        |
| UGDP        | 4926376   | 24        |
| UKPDS 33    | 9742976   | 25        |
| VADT        | 19092145  | 26        |

Trials are listed by acronym alphabetical order.

1. Action to Control Cardiovascular Risk in Diabetes Study G, Gerstein HC, Miller ME, Byington RP, Goff DC, Jr., Bigger JT, Buse JB, Cushman WC, Genuth S, Ismail-Beigi F, Grimm RH, Jr., Probstfield JL, Simons-Morton DG and Friedewald WT. Effects of intensive glucose lowering in type 2 diabetes. *N Engl J Med.* 2008;358:2545-59.
2. Griffin SJ, Borch-Johnsen K, Davies MJ, Khunti K, Rutten GE, Sandbaek A, Sharp SJ, Simmons RK, van den Donk M, Wareham NJ and Lauritzen T. Effect of early intensive multifactorial therapy on 5-year cardiovascular outcomes in individuals with type 2 diabetes detected by screening (ADDITION-Europe): a cluster-randomised trial. *Lancet.* 2011;378:156-67.
3. Group AC, Patel A, MacMahon S, Chalmers J, Neal B, Billot L, Woodward M, Marre M, Cooper M, Glasziou P, Grobbee D, Hamet P, Harrap S, Heller S, Liu L, Mancia G, Mogensen CE, Pan C, Poulter N, Rodgers A, Williams B, Bompont S, de Galan BE, Joshi R and Travert F. Intensive blood glucose control and vascular outcomes in patients with type 2 diabetes. *N Engl J Med.* 2008;358:2560-72.
4. Lincoff AM, Tardif JC, Schwartz GG, Nicholls SJ, Ryden L, Neal B, Malmberg K, Wedel H, Buse JB, Henry RR, Weichert A, Cannata R, Svensson A, Volz D and Grobbee DE. Effect of aloglitazar on cardiovascular outcomes after acute coronary syndrome in patients with type 2 diabetes mellitus: the AleCardio randomized clinical trial. *JAMA.* 2014;311:1515-25.
5. Neal B, Perkovic V, Mahaffey KW, de Zeeuw D, Fulcher G, Erondou N, Shaw W, Law G, Desai M, Matthews DR and Group CPC. Canagliflozin and Cardiovascular and Renal Events in Type 2 Diabetes. *N Engl J Med.* 2017;377:644-657.

6. Hansen LJ, Siersma V, Beck-Nielsen H and de Fine Olivarius N. Structured personal care of type 2 diabetes: a 19 year follow-up of the study Diabetes Care in General Practice (DCGP). *Diabetologia*. 2013;56:1243-53.
7. Marso SP, McGuire DK, Zinman B, Poulter NR, Emerson SS, Pieber TR, Pratley RE, Haahr PM, Lange M, Brown-Frandsen K, Moses A, Skibsted S, Kvist K and Buse JB. Efficacy and Safety of Degludec versus Glargine in Type 2 Diabetes. *N Engl J Med*. 2017;377:723-732.
8. Pfeffer MA, Claggett B, Diaz R, Dickstein K, Gerstein HC, Kober LV, Lawson FC, Ping L, Wei X, Lewis EF, Maggioni AP, McMurray JJ, Probstfield JL, Riddle MC, Solomon SD, Tardif JC and Investigators E. Lixisenatide in Patients with Type 2 Diabetes and Acute Coronary Syndrome. *N Engl J Med*. 2015;373:2247-57.
9. Zinman B, Wanner C, Lachin JM, Fitchett D, Bluhmki E, Hantel S, Mattheus M, Devins T, Johansen OE, Woerle HJ, Broedl UC, Inzucchi SE and Investigators E-RO. Empagliflozin, Cardiovascular Outcomes, and Mortality in Type 2 Diabetes. *N Engl J Med*. 2015;373:2117-28.
10. White WB, Cannon CP, Heller SR, Nissen SE, Bergenstal RM, Bakris GL, Perez AT, Fleck PR, Mehta CR, Kupfer S, Wilson C, Cushman WC, Zannad F and Investigators E. Alogliptin after acute coronary syndrome in patients with type 2 diabetes. *N Engl J Med*. 2013;369:1327-35.
11. Holman RR, Bethel MA, Mentz RJ, Thompson VP, Lokhnygina Y, Buse JB, Chan JC, Choi J, Gustavson SM, Iqbal N, Maggioni AP, Marso SP, Ohman P, Pagidipati NJ, Poulter N, Ramachandran A, Zinman B, Hernandez AF and Group ES. Effects of Once-Weekly Exenatide on Cardiovascular Outcomes in Type 2 Diabetes. *N Engl J Med*. 2017;377:1228-1239.
12. Raz I, Wilson PW, Strojek K, Kowalska I, Bozikov V, Gitt AK, Jermendy G, Campaigne BN, Kerr L, Milicevic Z and Jacober SJ. Effects of prandial versus fasting glycemia on cardiovascular outcomes in type 2 diabetes: the HEART2D trial. *Diabetes Care*. 2009;32:381-6.
13. Sone H, Tanaka S, Iimuro S, Tanaka S, Oida K, Yamasaki Y, Oikawa S, Ishibashi S, Katayama S, Yamashita H, Ito H, Yoshimura Y, Ohashi Y, Akanuma Y and Yamada N. Long-term lifestyle intervention lowers the incidence of stroke in Japanese patients with type 2 diabetes: a nationwide multicentre randomised controlled trial (the Japan Diabetes Complications Study). *Diabetologia*. 2010;53:419-28.
14. Marso SP, Daniels GH, Brown-Frandsen K, Kristensen P, Mann JF, Nauck MA, Nissen SE, Pocock S, Poulter NR, Ravn LS, Steinberg WM, Stockner M, Zinman B, Bergenstal RM, Buse JB, Committee LS and Investigators LT. Liraglutide and Cardiovascular Outcomes in Type 2 Diabetes. *N Engl J Med*. 2016;375:311-22.
15. Look ARG, Wing RR, Bolin P, Brancati FL, Bray GA, Clark JM, Coday M, Crow RS, Curtis JM, Egan CM, Espeland MA, Evans M, Foreyt JP, Ghazarian S, Gregg EW, Harrison B, Hazuda HP, Hill JO, Horton ES, Hubbard VS, Jakicic JM, Jeffery RW, Johnson KC, Kahn SE, Kitabchi AE, Knowler WC, Lewis CE, Maschak-Carey BJ, Montez MG, Murillo A, Nathan DM, Patricio J, Peters A, Pi-Sunyer X, Pownall H, Reboussin D, Regensteiner JG, Rickman AD, Ryan DH, Safford M, Wadden TA, Wagenknecht LE, West DS, Williamson DF and Yanovski SZ. Cardiovascular effects of intensive lifestyle intervention in type 2 diabetes. *N Engl J Med*. 2013;369:145-54.
16. Investigators OT, Gerstein HC, Bosch J, Dagenais GR, Diaz R, Jung H, Maggioni AP, Pogue J, Probstfield J, Ramachandran A, Riddle MC, Ryden LE and Yusuf S. Basal insulin and cardiovascular and other outcomes in dysglycemia. *N Engl J Med*. 2012;367:319-28.
17. Dormandy JA, Charbonnel B, Eckland DJ, Erdmann E, Massi-Benedetti M, Moules IK, Skene AM, Tan MH, Lefebvre PJ, Murray GD, Standl E, Wilcox RG, Wilhelmsen L, Betteridge J, Birkeland K, Golay A, Heine RJ, Koranyi L, Laakso M, Mokan M, Norkus A, Pirags V, Podar T, Scheen A, Scherbaum W, Scherthaner G, Schmitz O, Skrha J, Smith U and Taton J. Secondary prevention of macrovascular

events in patients with type 2 diabetes in the PROactive Study (PROspective pioglitAzone Clinical Trial In macroVascular Events): a randomised controlled trial. *Lancet*. 2005;366:1279-89.

18. Home PD, Pocock SJ, Beck-Nielsen H, Curtis PS, Gomis R, Hanefeld M, Jones NP, Komajda M and McMurray JJ. Rosiglitazone evaluated for cardiovascular outcomes in oral agent combination therapy for type 2 diabetes (RECORD): a multicentre, randomised, open-label trial. *Lancet*. 2009;373:2125-35.

19. Scirica BM, Bhatt DL, Braunwald E, Steg PG, Davidson J, Hirshberg B, Ohman P, Frederich R, Wiviott SD, Hoffman EB, Cavender MA, Udell JA, Desai NR, Mosenzon O, McGuire DK, Ray KK, Leiter LA, Raz I, Committee S-TS and Investigators. Saxagliptin and cardiovascular outcomes in patients with type 2 diabetes mellitus. *N Engl J Med*. 2013;369:1317-26.

20. Gæde P, Vedel P, Larsen N, Jensen GVH, Parving H-H and Pedersen O. Multifactorial Intervention and Cardiovascular Disease in Patients with Type 2 Diabetes. *New England Journal of Medicine*. 2003;348:383-393.

21. Marso SP, Bain SC, Consoli A, Eliaschewitz FG, Jodar E, Leiter LA, Lingvay I, Rosenstock J, Seufert J, Warren ML, Woo V, Hansen O, Holst AG, Pettersson J, Vilsboll T and Investigators S-. Semaglutide and Cardiovascular Outcomes in Patients with Type 2 Diabetes. *N Engl J Med*. 2016;375:1834-1844.

22. Green JB, Bethel MA, Armstrong PW, Buse JB, Engel SS, Garg J, Josse R, Kaufman KD, Koglin J, Korn S, Lachin JM, McGuire DK, Pencina MJ, Standl E, Stein PP, Suryawanshi S, Van de Werf F, Peterson ED, Holman RR and Group TS. Effect of Sitagliptin on Cardiovascular Outcomes in Type 2 Diabetes. *N Engl J Med*. 2015;373:232-42.

23. Vaccaro O, Masulli M, Nicolucci A, Bonora E, Del Prato S, Maggioni AP, Rivellese AA, Squatrito S, Giorda CB, Sesti G, Mocarelli P, Lucisano G, Sacco M, Signorini S, Cappellini F, Perriello G, Babini AC, Lapolla A, Gregori G, Giordano C, Corsi L, Buzzetti R, Clemente G, Di Cianni G, Iannarelli R, Cordera R, La Macchia O, Zamboni C, Scaranna C, Boemi M, Iovine C, Lauro D, Leotta S, Dall'Aglio E, Cannarsa E, Tonutti L, Pugliese G, Bossi AC, Anichini R, Dotta F, Di Benedetto A, Citro G, Antenucci D, Ricci L, Giorgino F, Santini C, Gnasso A, De Cosmo S, Zavaroni D, Vedovato M, Consoli A, Calabrese M, di Bartolo P, Fornengo P, Riccardi G, Thiazolidinediones Or Sulfonylureas Cardiovascular Accidents Intervention Trial study g and Italian Diabetes S. Effects on the incidence of cardiovascular events of the addition of pioglitazone versus sulfonylureas in patients with type 2 diabetes inadequately controlled with metformin (TOSCA.IT): a randomised, multicentre trial. *The lancet Diabetes & endocrinology*. 2017;5:887-897.

24. Meinert CL, Knatterud GL, Prout TE and Klimt CR. A study of the effects of hypoglycemic agents on vascular complications in patients with adult-onset diabetes. II. Mortality results. *Diabetes*. 1970;19:Suppl:789-830.

25. Intensive blood-glucose control with sulphonylureas or insulin compared with conventional treatment and risk of complications in patients with type 2 diabetes (UKPDS 33). UK Prospective Diabetes Study (UKPDS) Group. *Lancet*. 1998;352:837-53.

26. Duckworth W, Abraira C, Moritz T, Reda D, Emanuele N, Reaven PD, Zieve FJ, Marks J, Davis SN, Hayward R, Warren SR, Goldman S, McCarren M, Vitek ME, Henderson WG, Huang GD and Investigators V. Glucose control and vascular complications in veterans with type 2 diabetes. *N Engl J Med*. 2009;360:129-39.
